# Supplementary material for: Past Traumatic Life Events, Postpartum PTSD, and the Role of Labor Support
Source: MDPI journal article supplement (doi:10.3390/ijerph20116048), 2023-06-04
Supplement: s1 [file s1]

**Table S1.** Associations between PP-PTSD measured continuously and categorically and the subjective rates of traumatic birth experience and support during labour in the subsamples stratified by the absence/presence of past traumatic experiences.

| Outcome:                                            | PTSD symptoms according to CBITs continuous scale (0-53) |      |               |         | Clinically significant PTSD according to DSM-5 (yes/no) |      |            |         | Subjective rates of traumatic birth experience (0-10) |      |              |         |
|-----------------------------------------------------|----------------------------------------------------------|------|---------------|---------|---------------------------------------------------------|------|------------|---------|-------------------------------------------------------|------|--------------|---------|
| Predictor: Support during labour in the presence of | B/OR                                                     | SE   | 95% CI        | p-value | B/OR                                                    | SE   | 95% CI     | p-value | B/OR                                                  | SE   | 95% CI       | p-value |
| No past trauma                                      | -0.82                                                    | 0.57 | -1.95; 0.30   | 0.15    | 0.76                                                    | 0.19 | 0.53; 1.09 | 0.13    | -0.75                                                 | 0.15 | -1.04; -0.38 | <0.001  |
| At least one traumatic event in the past            | -1.08                                                    | 0.54 | -2.15; -0.01  | 0.047   | 0.70                                                    | 0.14 | 0.53; 0.92 | 0.010   | -0.71                                                 | 0.14 | -1.01; -0.47 | <0.001  |
| No physical assault in the past                     | -0.84                                                    | 0.41 | -1.65; -0.03  | 0.042   | 0.72                                                    | 0.12 | 0.57; 0.90 | 0.004   | -0.74                                                 | 0.10 | -0.94; -0.54 | <0.001  |
| Physical assault in the past                        | -2.04                                                    | 1.54 | -5.07; 0.99   | 0.19    | 0.85                                                    | 0.38 | 0.40; 1.80 | 0.67    | -0.80                                                 | 0.38 | -1.55; -0.05 | 0.038   |
| No sexual assault in the past                       | -0.93                                                    | 0.42 | -1.76; -0.10  | 0.027   | 0.70                                                    | 0.12 | 0.55; 0.88 | 0.002   | -0.73                                                 | 0.11 | -0.93; -0.52 | <0.001  |
| Sexual assault in the past                          | -0.32                                                    | 1.25 | -2.78; 2.15   | 0.80    | 1.15                                                    | 0.33 | 0.61; 2.18 | 0.67    | -0.81                                                 | 0.32 | -1.44; -0.18 | 0.011   |
| No child abuse in the past                          | -0.92                                                    | 0.43 | -1.77; -0.078 | 0.032   | 0.76                                                    | 0.13 | 0.59; 0.97 | 0.027   | -0.74                                                 | 0.11 | -0.95; -0.53 | <0.001  |
| Child abuse in the past                             | -1.21                                                    | 1.0  | -3.17; 0.75   | 0.23    | 0.58                                                    | 0.24 | 0.36; 0.93 | 0.023   | -0.79                                                 | 0.26 | -1.30; -0.29 | 0.002   |
| No perinatal loss in the past                       | -0.69                                                    | 0.46 | -1.59; 0.21   | 0.13    | 0.75                                                    | 0.13 | 0.58; 0.97 | 0.027   | -0.70                                                 | 0.12 | -0.93; -0.48 | <0.001  |

|                                     |       |      |                  |       |      |      |                |       |       |      |                  |        |
|-------------------------------------|-------|------|------------------|-------|------|------|----------------|-------|-------|------|------------------|--------|
| Perinatal loss in the past          | -1.61 | 0.82 | -3.22;<br>0.002  | 0.050 | 0.65 | 0.22 | 0.42;<br>1.002 | 0.051 | -0.85 | 0.20 | -1.24; -<br>0.45 | <0.001 |
| No previous childbirth              | -0.30 | 0.52 | -1.31;<br>0.72   | 0.57  | 0.87 | 0.13 | 0.67;<br>1.13  | 0.31  | -0.73 | 0.13 | -0.98; -<br>0.48 | <0.001 |
| Previous childbirth not traumatic   | -1.48 | 0.91 | -3.27;<br>0.31   | 0.10  | 0.56 | 0.38 | 0.26;<br>1.18  | 0.13  | -0.77 | 0.25 | -1.25;<br>0.29   | 0.002  |
| Previous traumatic birth experience | -1.87 | 0.88 | -3.61; -<br>0.13 | 0.035 | 0.53 | 0.27 | 0.31;<br>0.90  | 0.019 | -0.53 | 0.22 | -0.97; -<br>0.10 | 0.015  |

Note: B refers to unstandardized regression coefficient from multiple regression model; OR refers to odds ratio from bivariate logistic regression; SE refers to standard error; 95% CI refers to 95% confidence interval.  
All models are adjusted for maternal age at the time of childbirth, level of education, family status, socioeconomic status, history of mental disorders, gestational age at birth, time since the childbirth, and mode of birth.
